# Supplementary material for: Regulation of programmed cell death ligand 1 expression by atypical protein kinase C lambda/iota in cutaneous angiosarcoma
Source: PubMed Central journal article supplement — Cancer Sci. 2019 Mar 21;110(5):1780–9. doi: 10.1111/cas.13981 (PMC6500975; doi:10.1111/cas.13981), 2019-03-21
Supplement: CAS-110-1780-s002.pdf [file CAS-110-1780-s002.pdf]

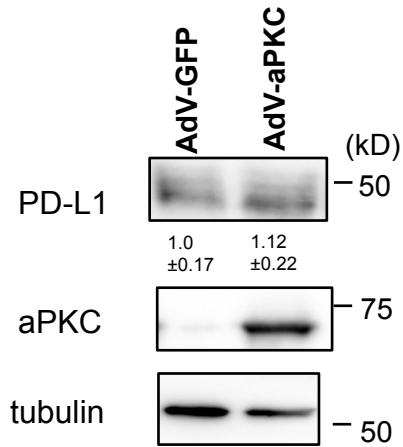

**Supplementary Figure 2: The effect of aPKC over expression on PD-L1 expression in HUVEC.** Cell lysates from PKC overexpressed HUVECs and control HUVECs were analyzed by western blotting with indicated antibodies. Values in the figure represents mean  $\pm$  S.E.M. of the intensity of the band corresponding to PD-L1 from 3 independent experiments.
